# Supplementary material for: Surface functionalization of metal–organic polyhedron for homogeneous cyclopropanation catalysis
Source: Royal Society of Chemistry journal article supplement (doi:10.1039/c1cc00030f), 2011-01-01
Supplement: c1cc00030f.pdf [file c1cc00030f.pdf]

**Supporting Information for *Chemical Communications***

**Surface Functionalization of Metal-Organic Polyhedron for  
Homogeneous Cyclopropanation Catalysis**

Weigang Lu, Daqiang Yuan, Andrey Yakovenko, and Hong-Cai Zhou\*

Department of Chemistry, Texas A&M University, College Station, Texas 77843,

USA

E-mail: [zhou@mail.chem.tamu.edu](mailto:zhou@mail.chem.tamu.edu)

- 1. Materials and Methods**
- 2. X-ray Crystallography**
- 3. Syntheses, Reactions, and Characterizations**
- 4. Infrared spectra (IR)**
- 5. Thermogravimetric Analysis (TGA)**
- 6. Powder X-ray Diffraction (PXRD)**
- 7. Gas Adsorption**
- 8. Absorption spectra**
- 9. HPLC data**
- 10. References**

## 1. Materials and Methods

Commercially available reagents were used as received without further purification. Nuclear magnetic resonance (NMR) data were collected on a Mercury 300 MHz NMR spectrometer. Fourier transform infrared spectroscopy (FTIR) data were collected on a SHIMADZU IRAffinity-1 FTIR Spectrophotometer. Elemental analyses (C, H, and N) were obtained from Canadian Microanalytical Service, Ltd. ESI-MS experiments were performed on a Voyager DE-STR mass spectrometer (Applied Biosystems, Foster City, CA). Ultraviolet/Visible (UV-Vis) absorption spectra were recorded on a SHIMADZU UV-2450 UV-Vis Spectrophotometer. Thermogravimetry analyses (TGA) were performed under N<sub>2</sub> on a SHIMADZU TGA-50 Thermogravimetric Analyzer, with a heating rate of 5 °C min<sup>-1</sup>. High performance liquid chromatography (HPLC) analysis was carried out on a SHIMADZU Prominence UFLC. Powder X-ray diffraction (PXRD) patterns were obtained on a BRUKER D8-Focus Bragg-Brentano X-ray Powder Diffractometer equipped with a Cu sealed tube ( $\lambda = 1.54178$ ) at a scan rate of 0.2 s deg<sup>-1</sup>, solid-state detector, and a routine power of 1400 W (40 kV, 35 mA).

## 2. X-ray Crystallography

Single crystal X-ray data (**MOP 1a**, **MOP 1b**, **MOP 2**, and **MOP 3**) were collected on a Bruker-AXS APEX-II CCD X-ray diffractometer equipped with a low temperature device and a fine-focus sealed-tube X-ray source (Mo-K $\alpha$  radiation,  $\lambda = 0.71073$  Å, graphite monochromated). Suitable single crystals were directly picked up from the mother liquor, attached to a glass loop and transferred to a designed cold stream of liquid nitrogen (110 K) for data collections. Raw data collection and reduction were done using APEX2 software.

Single crystal X-ray structure determination of **MOP 4** was performed at 100(2) K on the Advanced Photon Source on beamline 15ID-B in Argonne National Laboratory. Structures were solved by direct method and refined by full-matrix least-squares on  $F^2$  using *SHELXTL*<sup>[1]</sup>. Non-hydrogen atoms were refined with anisotropic displacement parameters during the final cycles. Organic hydrogen atoms were placed in calculated positions with isotropic displacement parameters set to  $1.2 \times U_{eq}$  of the attached atom. The solvent molecules are highly disordered, and attempts to locate and refine the solvent peaks were unsuccessful. Contributions to scattering due to these solvent

molecules were removed using the *SQUEEZE* routine of *PLATON*<sup>[2]</sup>; structures were then refined again using the data generated.

Crystal data for **MOP 1a**:  $C_{50}H_{30}Cu_2O_{11}$ ,  $M = 933.82$ , blue prism,  $0.22 \times 0.20 \times 0.17$  mm<sup>3</sup>, monoclinic, space group *C2/c* (No. 15),  $a = 13.99831(9)$ ,  $b = 30.543(2)$ ,  $c = 27.992(2)$  Å,  $\beta = 101.349(3)^\circ$ ,  $V = 11721(1)$  Å<sup>3</sup>,  $Z = 8$ ,  $D_c = 1.058$  g/cm<sup>3</sup>,  $F_{000} = 3808$ , MoK $\alpha$  radiation,  $\lambda = 0.71073$  Å,  $T = 110(2)$ K,  $2\theta_{max} = 53.1^\circ$ , 54362 reflections collected, 12065 unique ( $R_{int} = 0.0915$ ). Final  $Goof = 0.800$ ,  $RI = 0.0603$ ,  $wR2 = 0.1497$ ,  $R$  indices based on 6088 reflections with  $I > 2\sigma(I)$  (refinement on  $F^2$ ), 568 parameters,  $\mu = 0.772$  mm<sup>-1</sup>. CCDC-797901.

Crystal data for **MOP 1b**:  $C_{104}H_{72}Cu_4O_{24}S_2$ ,  $M = 2023.90$ , blue needle,  $0.30 \times 0.09 \times 0.07$  mm<sup>3</sup>, tetragonal, space group *I4/m* (No. 87),  $a = b = 25.160(3)$ ,  $c = 25.726(3)$  Å,  $V = 16285(3)$  Å<sup>3</sup>,  $Z = 4$ ,  $D_c = 0.825$  g/cm<sup>3</sup>,  $F_{000} = 4144$ , MoK $\alpha$  radiation,  $\lambda = 0.71073$  Å,  $T = 110(2)$ K,  $2\theta_{max} = 50.0^\circ$ , 48691 reflections collected, 7171 unique ( $R_{int} = 0.1608$ ). Final  $Goof = 1.026$ ,  $RI = 0.0666$ ,  $wR2 = 0.1224$ ,  $R$  indices based on 2789 reflections with  $I > 2\sigma(I)$  (refinement on  $F^2$ ), 317 parameters, 0 restraints.  $\mu = 0.585$  mm<sup>-1</sup>. CCDC-797902.

Crystal data for **MOP 2**:  $C_{118}H_{86}Cu_4N_2O_{28}$ ,  $M = 2234.05$ , blue prism,  $0.20 \times 0.20 \times 0.10$  mm<sup>3</sup>, triclinic, space group *P-1* (No. 2),  $a = 14.852(3)$ ,  $b = 16.673(3)$ ,  $c = 17.458(6)$  Å,  $\alpha = 110.385(4)$ ,  $\beta = 103.907(4)$ ,  $\gamma = 108.850(3)^\circ$ ,  $V = 3518.6(15)$  Å<sup>3</sup>,  $Z = 1$ ,  $D_c = 1.054$  g/cm<sup>3</sup>,  $F_{000} = 1148$ , MoK $\alpha$  radiation,  $\lambda = 0.71073$  Å,  $T = 110(2)$ K,  $2\theta_{max} = 52.0^\circ$ , 27594 reflections collected, 13625 unique ( $R_{int} = 0.0733$ ). Final  $Goof = 1.012$ ,  $RI = 0.0710$ ,  $wR2 = 0.1361$ ,  $R$  indices based on 5835 reflections with  $I > 2(I)$  (refinement on  $F^2$ ), 574 parameters, 40 restraints.  $\mu = 0.656$  mm<sup>-1</sup>. CCDC-797903.

Crystal data for **MOP 3**:  $C_{124}H_{96}Cu_4O_{28}$ ,  $M = 2288.17$ , blue prism,  $0.30 \times 0.20 \times 0.10$  mm<sup>3</sup>, monoclinic, space group *C2/c* (No. 15),  $a = 26.047(5)$ ,  $b = 18.101(3)$ ,  $c = 33.213(6)$  Å,  $\beta = 105.478(2)^\circ$ ,  $V = 15091(5)$  Å<sup>3</sup>,  $Z = 4$ ,  $D_c = 1.007$  g/cm<sup>3</sup>,  $F_{000} = 4720$ , MoK $\alpha$  radiation,  $\lambda = 0.71073$  Å,  $T = 110(2)$ K,  $2\theta_{max} = 52.0^\circ$ , 56618 reflections collected, 14663 unique ( $R_{int} = 0.1011$ ). Final  $Goof = 1.049$ ,  $RI = 0.0940$ ,  $wR2 = 0.2035$ ,  $R$  indices based on 6129 reflections with  $I > 2(I)$  (refinement on  $F^2$ ), 494 parameters, 216 restraints.  $\mu = 0.613$  mm<sup>-1</sup>. CCDC-797904.

Crystal data for **MOP 4**:  $C_{169}H_{191}Cu_4N_4O_{29}$ ,  $M = 2996.42$ , blue prism,  $0.12 \times 0.08 \times 0.07$  mm<sup>3</sup>, monoclinic, space group *P2<sub>1</sub>/n* (No. 14),  $a = 15.2237(9)$ ,  $b = 28.909(2)$ ,  $c = 36.303(2)$  Å,  $\beta = 100.644(1)^\circ$ ,  $V = 15701(2)$  Å<sup>3</sup>,  $Z = 4$ ,  $D_c = 1.268$

$\text{g}/\text{cm}^3$ ,  $F_{000} = 6324$ , synchrotron radiation,  $\lambda = 0.41328 \text{ \AA}$ ,  $T = 100(2)\text{K}$ ,  $2\theta_{\text{max}} = 30.0^\circ$ , 211393 reflections collected, 31563 unique ( $R_{\text{int}} = 0.1063$ ). Final  $\text{Goof} = 0.978$ ,  $RI = 0.1196$ ,  $wR2 = 0.2281$ ,  $R$  indices based on 16598 reflections with  $I > 2(I)$  (refinement on  $F^2$ ), 1510 parameters, 155 restraints,  $\mu = 0.326\text{mm}^{-1}$ . CCDC-797905.

### 3. Syntheses, Reactions, and Characterizations

#### 3.1 Synthesis of 3,3'-((5-hydroxymethyl)-1,3phenylene)bis(ethyne-2,1-diyl)dibenzoic acid, $\text{H}_2\text{L}$

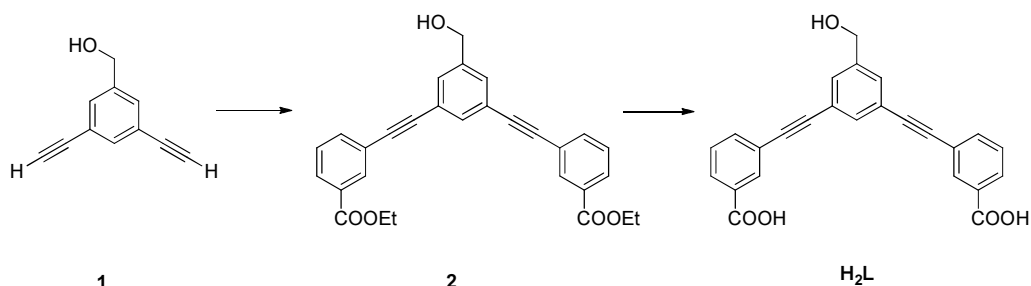

##### 3.1.1 Synthesis of diethyl 3,3'-((5-hydroxymethyl)-1,3phenylene)bis(ethyne-2,1-diyl)dibenzoate, $\text{2}$ .<sup>[1]</sup>

3,5-diethynylbenzyl alcohol (**1** 2.0 g, 12.8 mmol, synthesized according to literature<sup>[2]</sup>),  $\text{Pd}(\text{PPh}_3)_4$  (300 mg, 0.26 mmol), and  $\text{CuI}$  (25.0 mg, 0.13 mmol) were placed in a 250 ml three necked round bottom flask equipped with a reflux condenser. Under nitrogen atmosphere and ice bath, 100 mL of degassed triethylamine was introduced in via cannula, and then ethyl 3-iodobenzoate (4.3 mL, 25.6 mmol) was syringed into above mixture. The system was then heated at  $70^\circ\text{C}$  for 12 h. Cooled to room temperature, precipitates were removed by filtration and the filtrate was evaporated to remove most of organic solvents, extracted with dichloromethane, washed with saturated  $\text{NaHCO}_3$ , water, brine, and then dried with  $\text{MgSO}_4$ . Filtered, and concentrated to dryness. The product was purified by column chromatography (hexanes/ethyl acetate, 4/1) to afford compound **2** (4.9 g, 85%).  $^1\text{H NMR}$  (300 MHz,  $\text{CDCl}_3$ ):  $\delta$  8.12 (brs, 2H), 7.93 (d, 2H), 7.61 (d, 2H), 7.56 (brs, 1H), 7.46 (brs, 2H), 7.34 (t, 2H), 4.66 (brs, 2H), 4.32 (q, 4H), 3.56 (brs, 1H), 1.36(t, 6H).

##### 3.1.2 Synthesis of 3,3'-((5-hydroxymethyl)-1,3phenylene)bis(ethyne-2,1-diyl)dibenzoic acid, $\text{H}_2\text{L}$

10 mL of 2 mol/L  $\text{NaOH}$  was added to a solution of compound **2** (3.9 g, 8.6 mmol) in 100 mL  $\text{THF}/\text{MeOH}$  ( $v/v = 1/1$ ), the resulting mixture was stirred overnight at room temperature. Most of organic solvents were removed by Rota vapor, the resulting

water solution was diluted to 50 mL, and concentrated HCl was added to adjust the PH value to 2. The white precipitate was collected, washed with water, and dried under vacuum to afford **H<sub>2</sub>L** (2.8 g, 82%). <sup>1</sup>H NMR (300 MHz, DMSO-d<sub>6</sub>): δ 8.09 (t, 2H), 7.98 (dt, 2H), 7.82 (dt, 2H), 7.70 (t, 1H), 7.59 (brs, 2H), 7.58 (t, 2H), 5.42 (t, 1H), 4.55 (d, 2H) ppm; <sup>13</sup>C NMR (75 MHz, DMSO-d<sub>6</sub>) δ 166.94, 144.56, 135.85, 132.87, 132.54, 131.87, 130.12, 130.06, 129.72, 122.87, 122.82, 89.61, 89.28, 62.34 ppm; *m/z* (ESI) 167.07 (100%), 209.11 (59%) and 395.13 (M<sup>-</sup>, 73%). Elemental analysis (% calc/found): C 75.75/72.55, H 4.07/3.82). TGA was shown in **Fig. S2**.

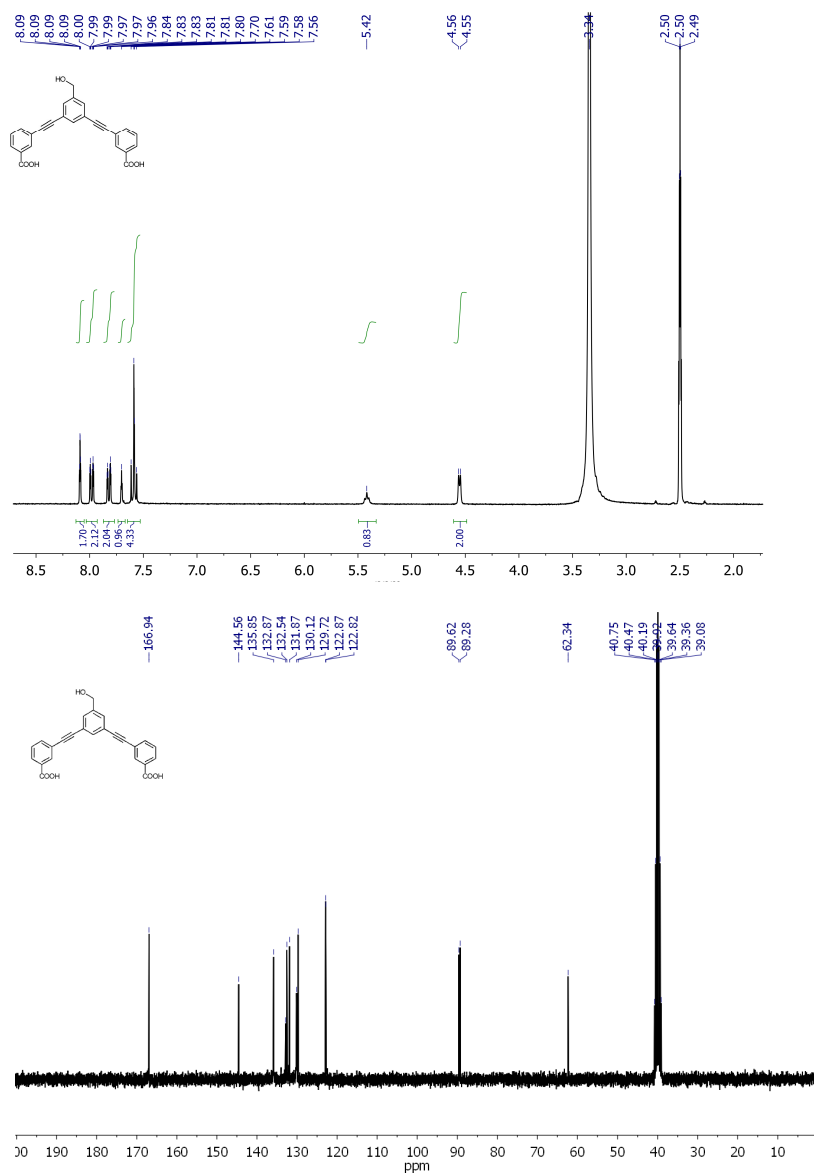

### 3.2 Synthesis of MOP 1a

To a vial containing an N,N-diethylformamide (DEF, 2.0 mL) solution of **H<sub>2</sub>L** (39 mg, 0.1 mmol) and Cu(NO<sub>3</sub>)<sub>2</sub>•2.5H<sub>2</sub>O (27 mg, 0.1 mmol) add 44 mg of 2,6-

dimethylpyridine (0.4 mmol). The resulting solution was layer with 2.0 mL of methanol, and the vial was sealed, allowed to stand at room temperature. 3 days later, Prismatic crystals were collected, washed with a little DEF and methanol, and then dried in air (Yield: 25 mg). PXRD of as-synthesized **MOP 1a** was shown in **Fig. S4**, TGA in **Fig. S3**, and IR in **Fig. S1**.

### 3.3 Synthesis of MOP 1b

To a vial containing an dimethyl sulfoxide (DMSO, 2.0 mL) solution of **H<sub>2</sub>L** (39 mg, 0.1 mmol) and Cu(NO<sub>3</sub>)<sub>2</sub>•2.5H<sub>2</sub>O (27 mg, 0.1 mmol) add 132 mg of 2,6-dimethylpyridine (1.2 mmol). The resulting solution was layer with 2.0 mL of acetone, and the vial was sealed, allowed to stand at room temperature. 3 days later, prismatic crystals were collected, washed with a little DMSO and acetone, and then dried in air (Yield: 30 mg). PXRD of as synthesized **MOP 1b** was shown in **Fig. S5**, TGA in **Fig. S3**, and IR in **Fig. S1**.

### 3.4 Activated MOP 1

**MOP 1a** or **MOP 1b** was soaked in methanol for 3 days (replaced with fresh methanol three times), and then dichloromethane for 3 days (replaced with fresh dichloromethane three times). After solvent was decanted, the solid was dried under dynamic vacuum at 100<sup>0</sup>C for 12 h (color changed from green to blue). TGA of **activated MOP 1** was shown in **Fig. S2**.

### 3.5 Synthesis of MOP 2

To a solution of **as-activated MOP 1** (50 mg, MW: 1831.69, 0.027 mmol) and DMAP (4.0 mg, MW: 122, 0.033 mmol) in dried DMF (10 mL) add acetic anhydride (25 μL, MW: 102.09, 0.26 mmol), the resulting mixture was stirred at room temperature under N<sub>2</sub> overnight. DMF was removed under high vacuum at room temperature, 20 mL methanol was added; the resulting green suspension was centrifuged, and the supernatant was carefully decanted. Fresh methanol (20 mL) was added to the residue, stirred for a while, centrifugation and supernatant removal were repeated twice, The resulted green solid was dried under vacuum to produce 55 mg blue powder (~100% yield). 20 mg of above blue powder was dispersed in 10 mL of 1.0 mol/L HCl, sonicated 10 min, the resulted white suspension was collected with centrifuge, washed with water three times, dried over Mg(SO<sub>4</sub>)<sub>2</sub>, Filtered, and concentrated to dryness, The product was dried under vacuum (17 mg), and checked with <sup>1</sup>H-NMR. (300 MHz, DMSO-d<sub>6</sub>): δ 8.11 (brt, 2H), 7.99 (dt, *J* = 7.8 Hz, 2H), 7.82

(dt,  $J = 7.8$  Hz, 2H), 7.80 (t,  $J = 1.5$  Hz, 1H), 7.66 (d,  $J = 1.5$  Hz, 2H), 7.60 (t,  $J = 7.8$  Hz, 2H), 5.13 (s, 2H), 2.12 (s, 3H) ppm.

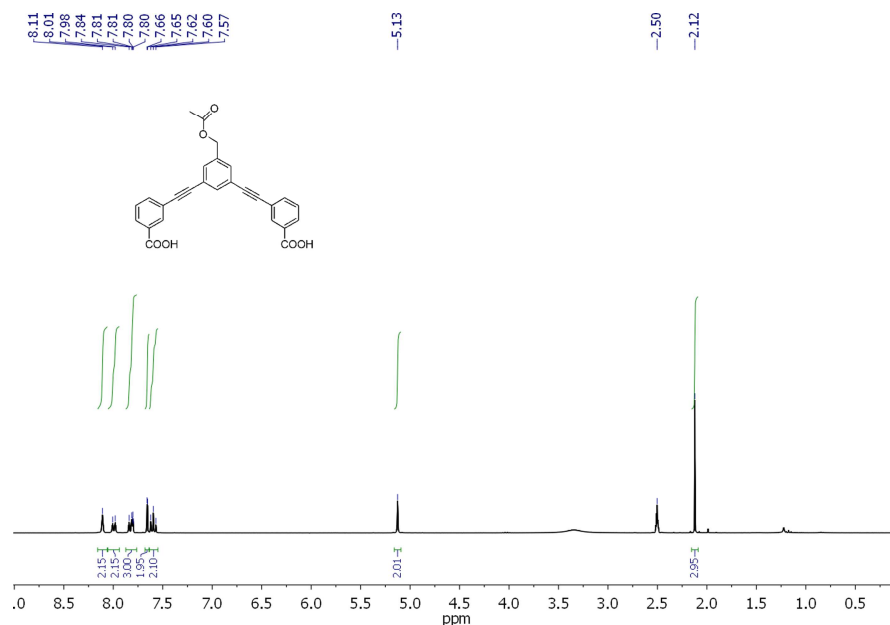

A 3.0 mL inner vial containing a solution of 20 mg above blue powder in 1.0 mL DEF was placed inside a 20 mL outer vial containing 3.0 mL methanol, the outer vial was then sealed. Green block crystals were formed and collected after the solution in the inner vial was colorless. PXRD of as-synthesized **MOP 2** was shown in **Fig. S6**, TGA in **Fig. S3**, and IR in **Fig. S1**.

### 3.6 Synthesis of MOP 3

To a solution of **as-activated MOP 1** (50 mg, MW: 1831.69, 0.027 mmol) and DMAP (4.0 mg, MW: 122, 0.033 mmol) in dried DMF (10 mL) add hexanoic anhydride (60  $\mu$ L, MW: 214.3, 0.26 mmol), the resulting mixture was stirred at room temperature under  $N_2$  overnight. Most of DMF was removed under high vacuum at room temperature, 20 mL methanol was added; the resulting green suspension was centrifuged, and the supernatant was carefully decanted. Fresh methanol (20 mL) was added to the residue, stirred for a while, centrifugation and supernatant removal were repeated twice, the resulted green solid was dried under vacuum to produce 61 mg blue powder (~100% yield). 20 mg of above blue powder was dispersed in 10 mL of 1.0 mol/L HCl, sonicated 10 min, the resulted white suspension was collected with centrifuge, washed with water three times, dried over  $Mg(SO_4)_2$ , Filtered, and concentrated to dryness, The product was dried under vacuum (17 mg), and checked with  $^1H$ -NMR (300 MHz,  $DMSO-d_6$ ):  $\delta$  8.10 (brt, 2H), 7.99 (dt,  $J = 7.8$  Hz, 2H), 7.82

(dt,  $J = 7.8$  Hz, 2H), 7.79 (t,  $J = 1.5$  Hz, 1H), 7.63 (brd, 2H), 7.59 (t,  $J = 7.8$  Hz, 2H), 5.14 (s, 2H), 2.40 (t,  $J = 7.2$  Hz, 2H), 1.56 (m, 2H), 1.27 (m, 4H) 0.85 (t,  $J = 8.7$  Hz, 3H) ppm.

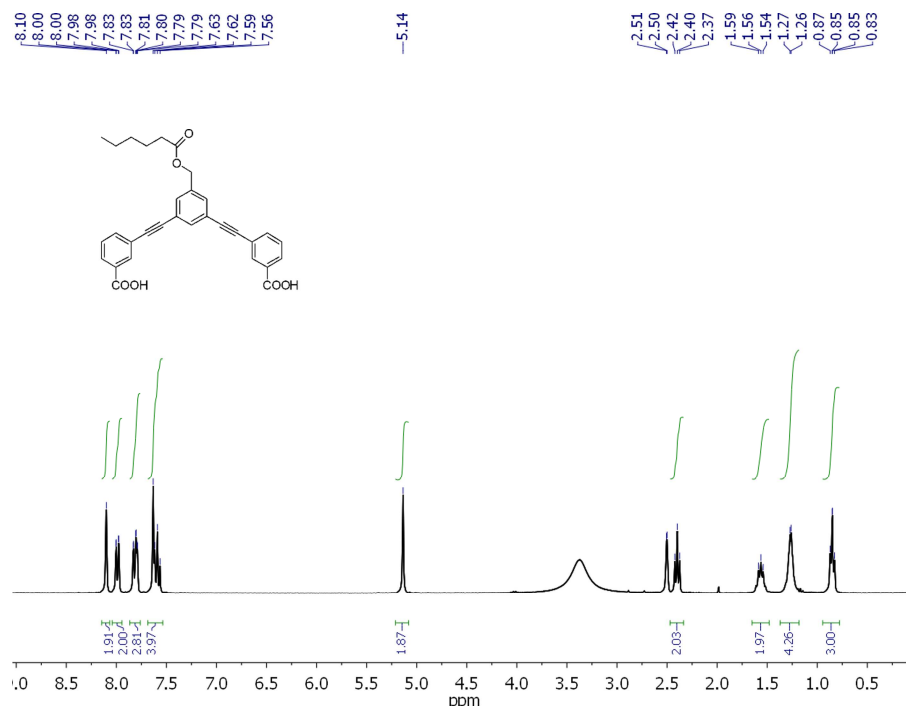

A 3.0 mL inner vial containing a solution of 20 mg above blue powder in 1.0 mL DEF was placed inside a 20 mL outer vial containing 3.0 mL methanol, the outer vial was then sealed. Prismatic crystals were formed and collected after the solution in the inner vial was colorless. PXRD of as-synthesized **MOP 3** was shown in **Fig. S7**, TGA in **Fig. S3**, and IR in **Fig. S1**.

### 3.7 Synthesis of MOP 4

To a solution of **as-activated MOP 1** (50 mg, MW: 1831.69, 0.027 mmol) and DMAP (4.0 mg, MW: 122, 0.033 mmol) in dried DMF (10 mL) add Lauric anhydride (100 mg, MW: 382.63, 0.26 mmol), the resulting mixture was stirred at room temperature under  $N_2$  overnight. Most of DMF was removed under high vacuum at room temperature, 20 mL methanol was added; the resulting green suspension was centrifuged, and the supernatant was carefully decanted. Fresh methanol (20 mL) was added to the residue, stirred for a while, centrifugation and supernatant removal were repeated twice, and the resulted green solid was dried under vacuum to produce 68 mg blue powder (~100% yield). 20 mg of above blue powder was dispersed in 10 mL of 1.0 mol/L HCl, sonicated 10min, the resulted white suspension was collected with centrifuge, washed with water three times, dried over  $Mg(SO_4)_2$ , Filtered, and



concentrated to dryness, The product was dried under vacuum (18 mg), and checked with  $^1\text{H-NMR}$  (300 MHz,  $\text{DMSO-d}_6$ ):  $\delta$  8.10 (t,  $J = 1.5 \text{ Hz}$ , 2H), 7.99 (dt,  $J = 7.8$  and  $1.5 \text{ Hz}$ , 2H), 7.82 (dt,  $J = 7.8$  and  $1.5 \text{ Hz}$ , 2H), 7.79 (t,  $J = 1.5 \text{ Hz}$ , 1H), 7.63 (d,  $J = 1.5 \text{ Hz}$ , 2H), 7.59 (t,  $J = 7.8 \text{ Hz}$ , 2H), 5.14 (s, 2H), 2.39 (t,  $J = 7.2 \text{ Hz}$ , 2H), 1.55 (m, 2H), 1.23-1.16 (m, 18H) 0.80 (t,  $J = 7.8 \text{ Hz}$ , 3H) ppm.

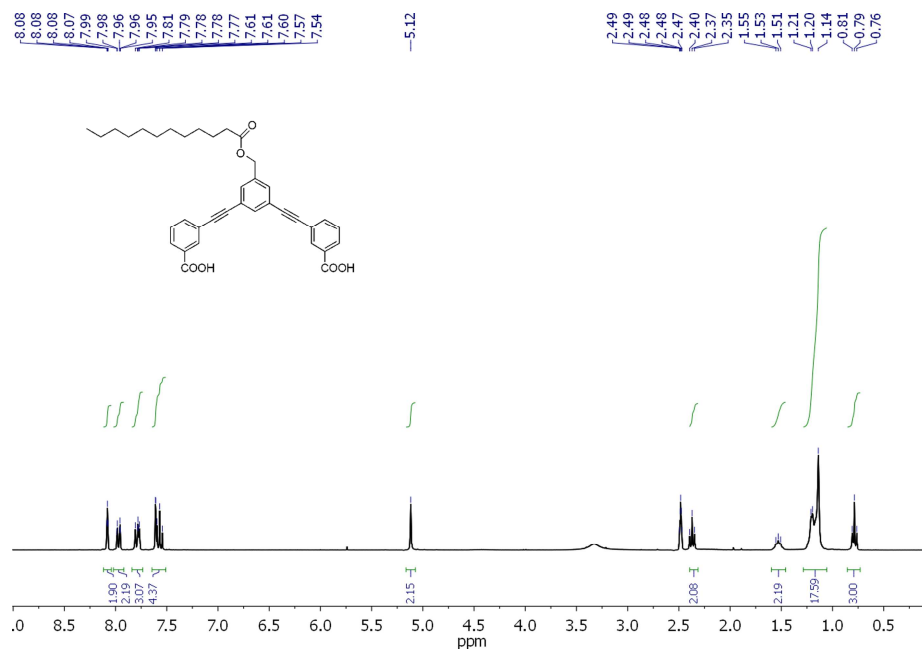

A 3.0 mL inner vial containing a solution of 20 mg above blue powder in 1.0 mL DEF was placed inside a 20 mL outer vial containing 3.0 mL methanol, the outer vial was then sealed. Green block crystals were formed and collected after the solution in the inner vial was colorless. PXRD of as-synthesized **MOP 4** was shown in **Fig. S8**, TGA in **Fig. S3**, and IR in **Fig. S1**.

#### 4. Infrared spectra (IR)

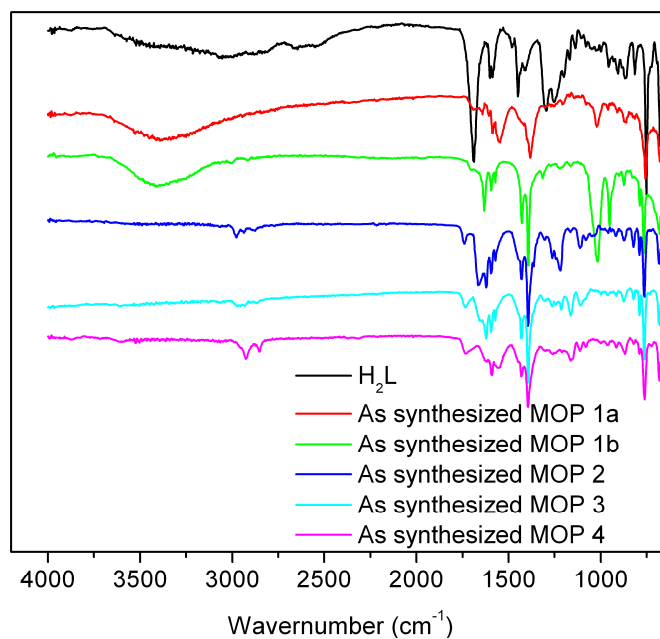

**Fig. S1** IR spectra of H<sub>2</sub>L and as-synthesized MOP 1a, MOP 1b, MOP 2, MOP 3, and MOP 4.

## 5. Thermogravimetric Analysis (TGA)

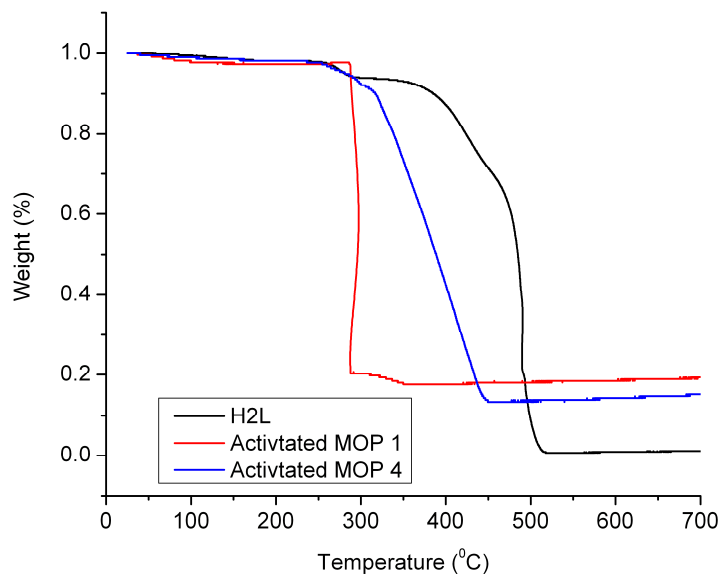

**Fig. S2** TGA curves of H<sub>2</sub>L, activated MOP 1, and MOP 4.

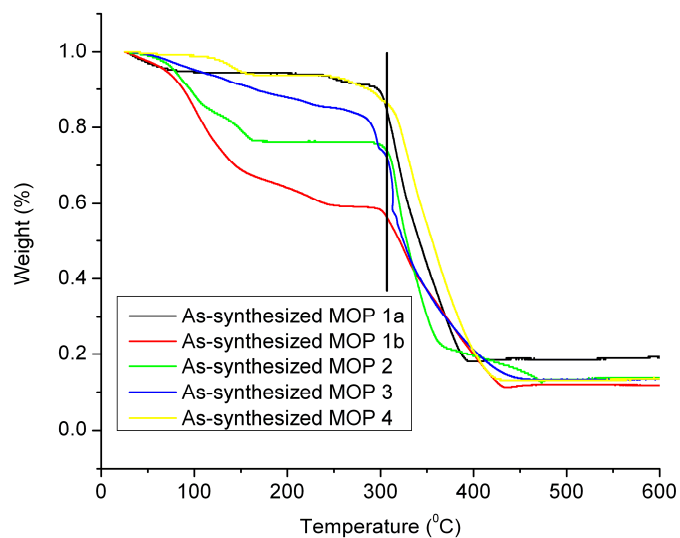

**Fig. S3** TGA curves of as-synthesized MOP 1a, MOP 1b, MOP 2, MOP 3, and MOP 4.

## 6. Powder X-ray Diffraction (PXRD)

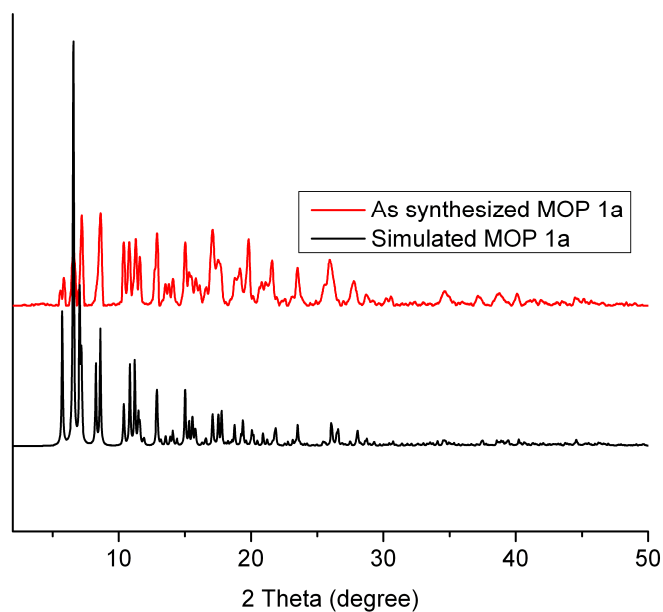

**Fig. S4** Powder X-ray diffraction (PXRD) patterns of MOP 1a: pattern simulated from single crystal structure in black; observed pattern for the prepared sample in red.

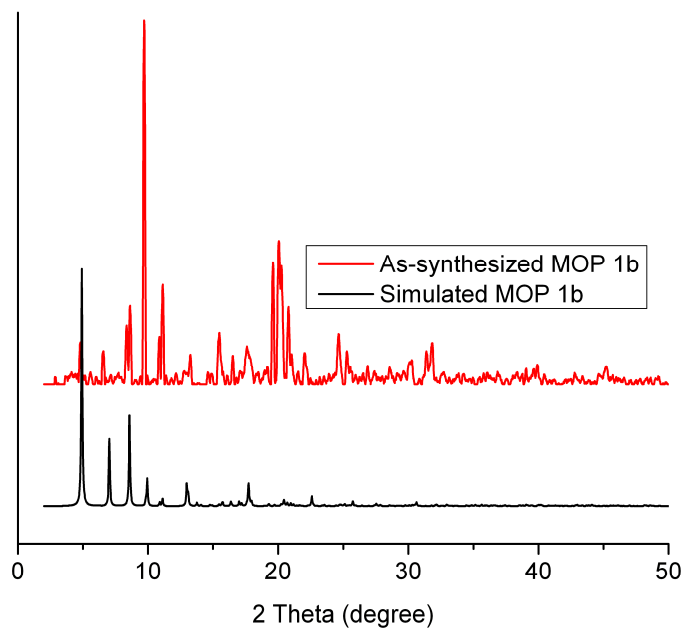

**Fig. S5** Powder X-ray diffraction (PXRD) patterns of MOP 1b: pattern simulated from single crystal structure in black; observed pattern for the prepared sample in red.

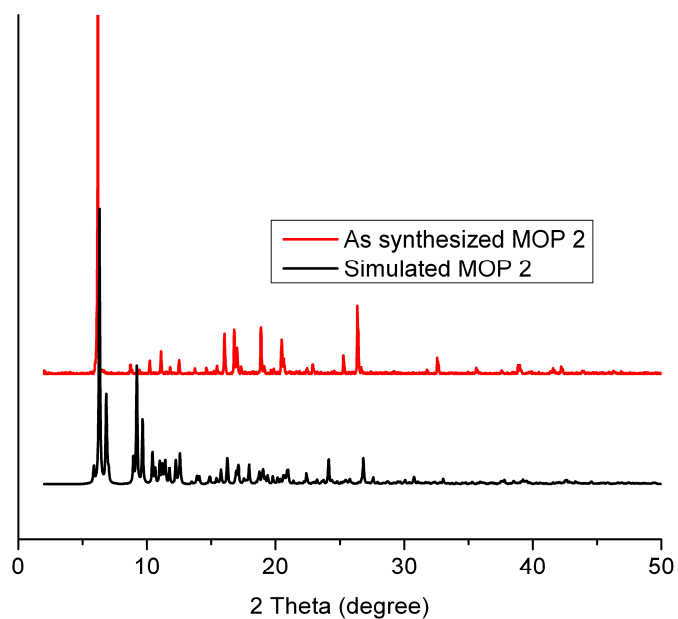

**Fig. S6** Powder X-ray diffraction (PXRD) patterns of MOP 2: pattern simulated from single crystal structure in black; observed pattern for the prepared sample in red.

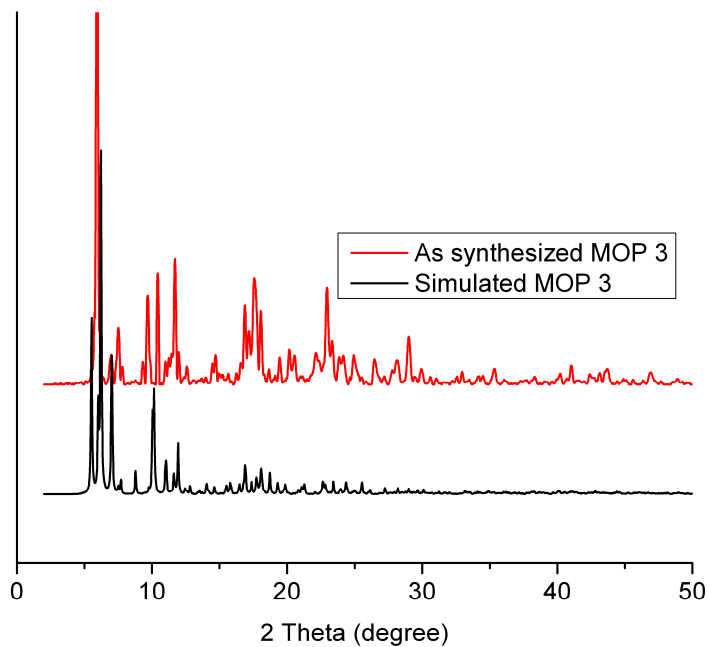

**Fig. S7** Powder X-ray diffraction (PXRD) patterns of MOP 3: pattern simulated from single crystal structure in black; observed pattern for the prepared sample in red.

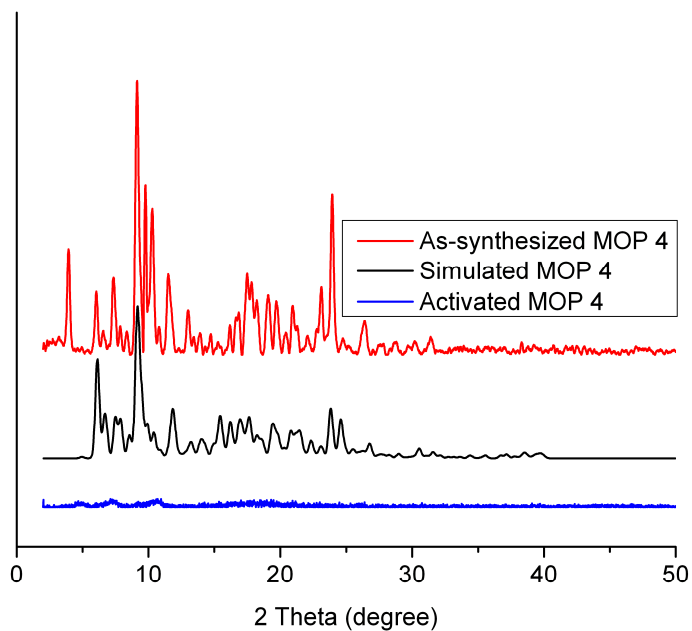

**Fig. S8** Powder X-ray diffraction (PXRD) patterns of MOP 4: pattern simulated from single crystal structure in black; observed pattern for the prepared sample in red; and observed pattern for activated sample in blue.

## 7. Gas Adsorption

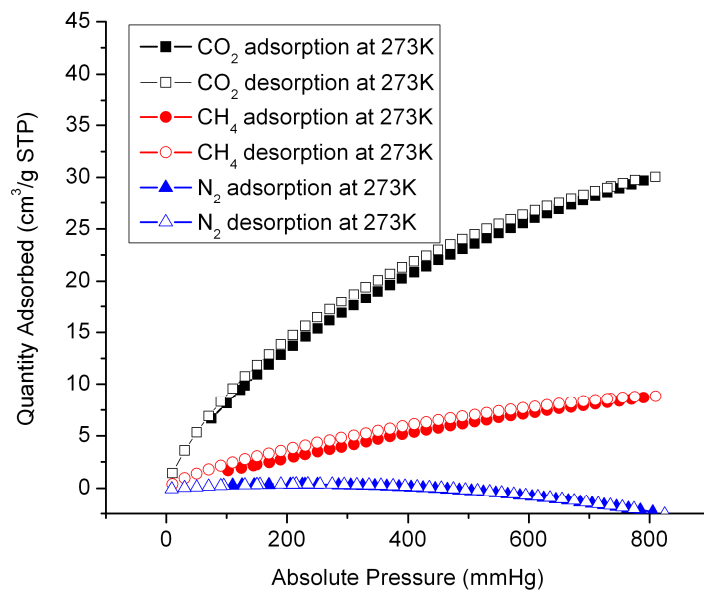

Fig. S9 CO<sub>2</sub>, CH<sub>4</sub>, and N<sub>2</sub> sorption isotherms of activated MOP 1 at 273K (215mg sample used for measurement).

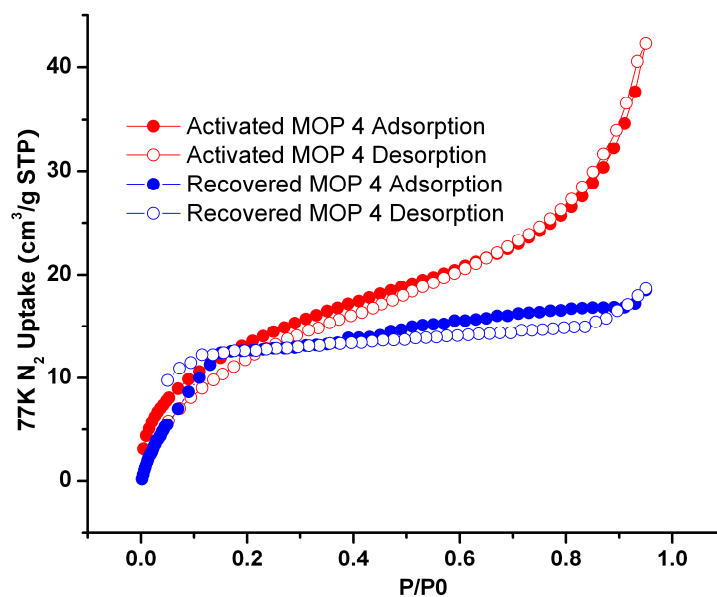

Fig. S10 N<sub>2</sub> sorption isotherms of activated MOP 4 and recovered MOP 4 at 77K.

## 8. Absorption spectra

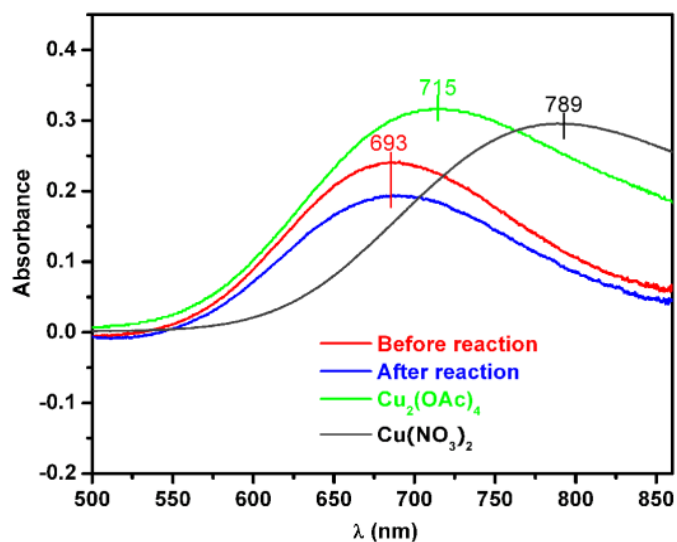

**Fig. S11** Absorption spectra of MOP 4 before (red) and after (blue) the catalytic reaction, copper acetate (green), as well as copper nitrate (black).

## 9. HPLC data

Ethyl trans-2-phenylcyclopropanecarboxylate and its cis isomer were separated from the reaction of styrene and EDA with MOP-4 as catalyst. Their NMR data were in good agreement with Literatures'.

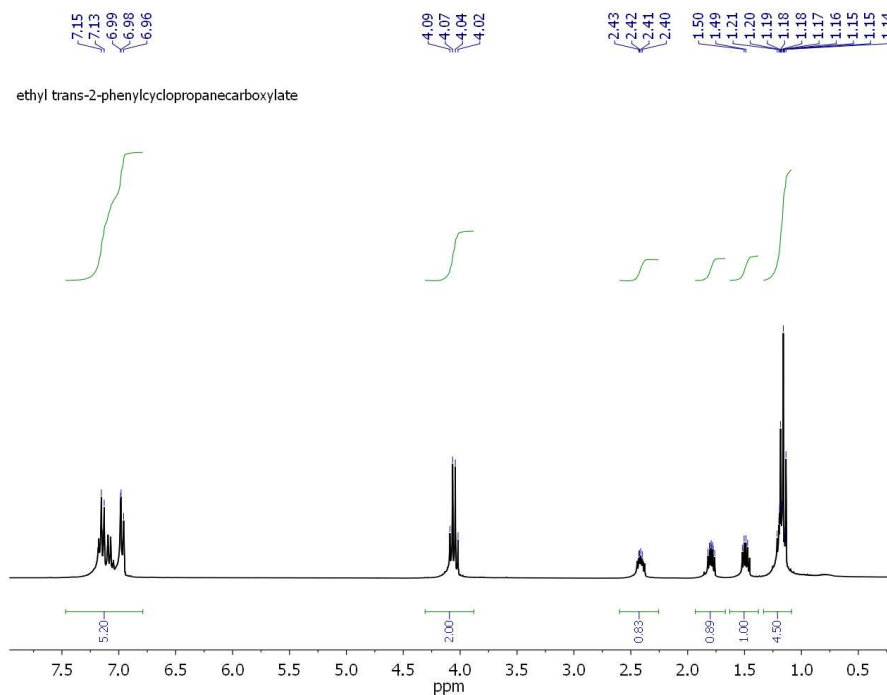

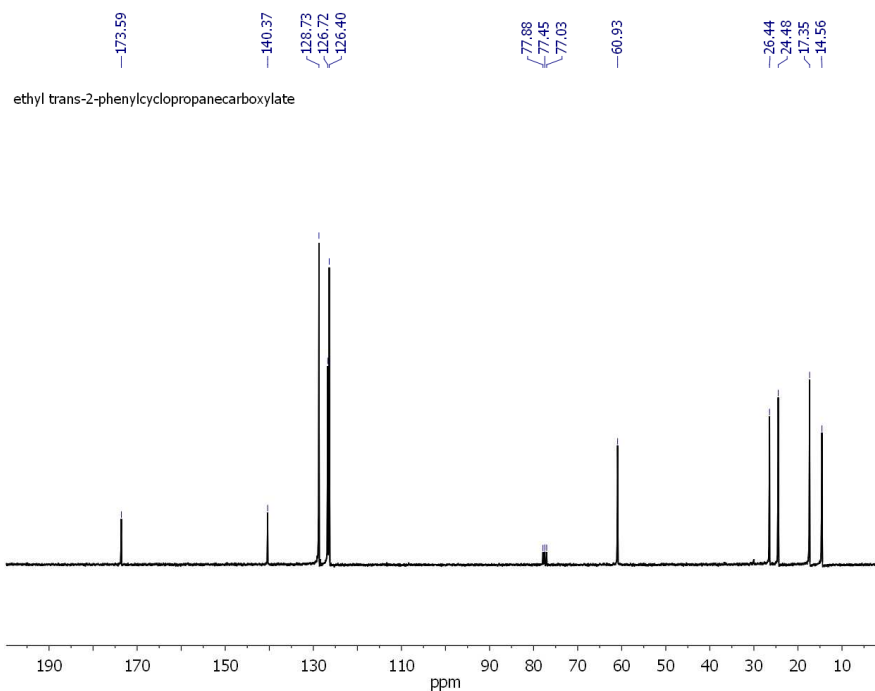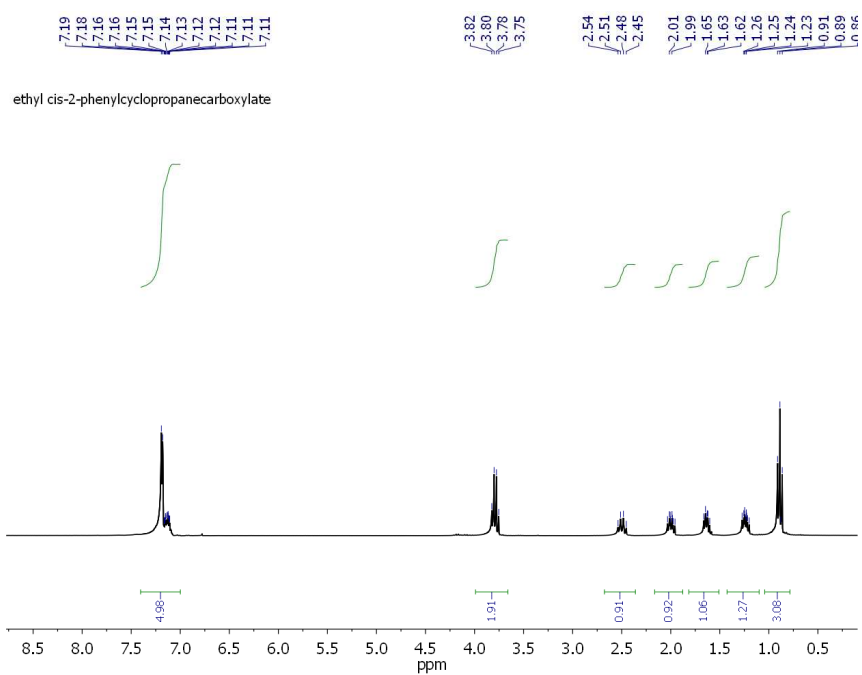



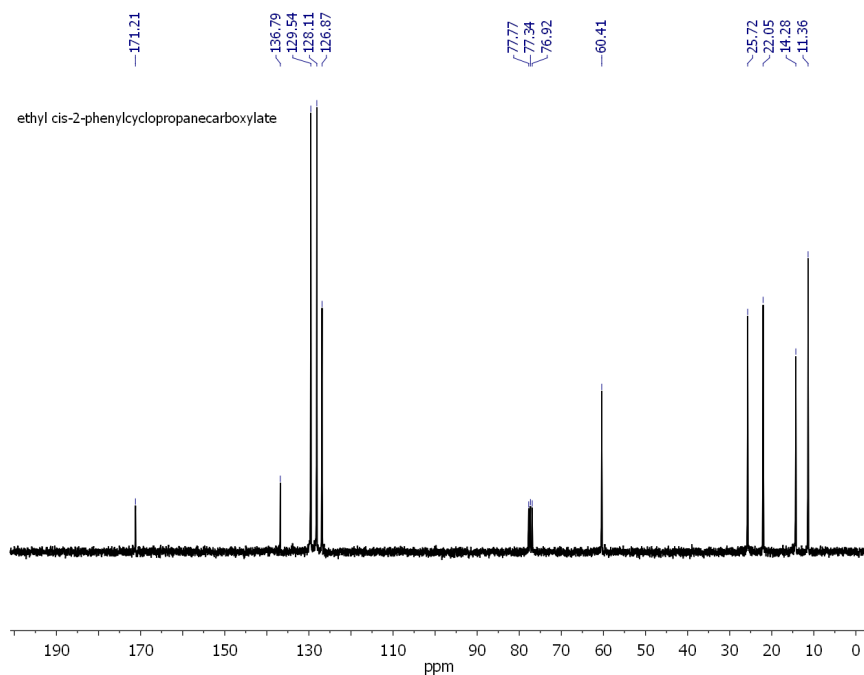

### 9.1 Trans and Cis calibration

Calibration solution: 0.5 mg ethyl trans-2-phenylcyclopropanecarboxylate and 0.5 mg ethyl cis-2-phenylcyclopropanecarboxylate was dissolved in 1.0 mL methanol.

ID# : 1  
 Name : Cis  
 Quantitative Method : External Standard  
 Function :  $f(x)=5.5734e-007*x-0.00404801$   
 Rr1=0.9999672 Rr2=0.9999344  
 MeanRF:5.56899e-007 RFSD:2.699e-009 RFRSD:0.484648  
 FitType : Linear  
 ZeroThrough : Not Through  
 Weighted Regression : None  
 Detector Name : PDA

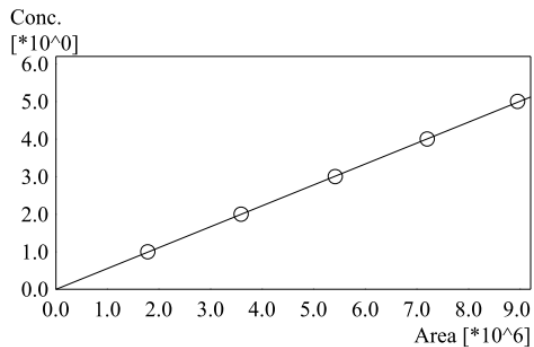

| # | Conc. (Ratio) | MeanArea  | Area    |
|---|---------------|-----------|---------|
| 1 | 1.000         | 1784938.6 | 1788206 |
|   |               |           | 1781140 |
|   |               |           | 1785470 |
| 2 | 2.000         | 3593098.7 | 3604515 |
|   |               |           | 3600553 |
|   |               |           | 3574228 |
| 3 | 3.000         | 5419739.0 | 5431052 |
|   |               |           | 5403658 |
|   |               |           | 5424507 |
| 4 | 4.000         | 7200023.7 | 7196682 |
|   |               |           | 7200207 |
|   |               |           | 7203182 |
| 5 | 5.000         | 8952073.4 | 8956711 |
|   |               |           | 8959308 |
|   |               |           | 8940201 |

ID# : 2  
Name : Trans  
Quantitative Method : External Standard  
Function :  $f(x)=4.1217e-007*x+0.0271351$   
Rr1=0.9999590 Rr2=0.9999181  
MeanRF:4.17703e-007 RFSD:5.52846e-009 RFRSD:1.32354  
FitType : Linear  
ZeroThrough : Not Through  
Weighted Regression : None  
Detector Name : PDA

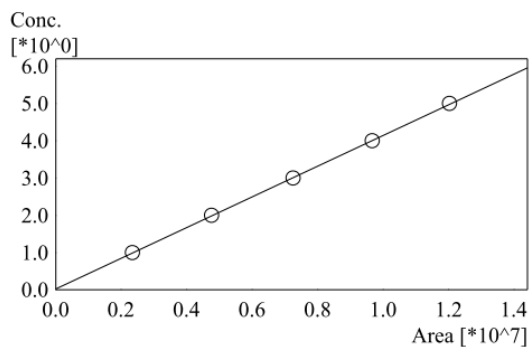

| # | Conc. (Ratio) | MeanArea   | Area     |
|---|---------------|------------|----------|
| 1 | 1.000         | 2349585.3  | 2364642  |
|   |               |            | 2340547  |
|   |               |            | 2343567  |
| 2 | 2.000         | 4763252.0  | 4812180  |
|   |               |            | 4801372  |
|   |               |            | 4676204  |
| 3 | 3.000         | 7255235.8  | 7246887  |
|   |               |            | 7251092  |
|   |               |            | 7267729  |
| 4 | 4.000         | 9668724.4  | 9652383  |
|   |               |            | 9647040  |
|   |               |            | 9706750  |
| 5 | 5.000         | 12026768.4 | 12068225 |
|   |               |            | 12040548 |
|   |               |            | 11971532 |

## 9.2 First run

0.3 mL EDA (2.4 mmol) was dissolved in 5.0 mL dichloromethane, and was added in 10 h into a stirred solution of 0.5 mL styrene, and 15 mg activated MOP 4 (0.024 mmol open copper sites) in 5.0 mL dichloromethane at room temperature, stirred for another 10 h. 10 mL methanol was added, MOP 4 was precipitated, collected, dried, and used for next run. The filtrate was diluted to 250 mL with methanol, and then used for HPLC analysis.

Sample Information

Acquired by : Admin  
Sample Name : Unknown Sample  
Sample ID : UNK-0001  
Tray# : 1  
Vial# : 14  
Injection Volume : 5 uL  
Data Filename : Lu-1-206-04212010\_4212010\_1.lcd  
Method Filename : Shodex ORpak 60%MeOH 0.6mL.lcm  
Report Filename : Default.lcr  
Date Acquired : 4/23/2010 2:55:56 PM

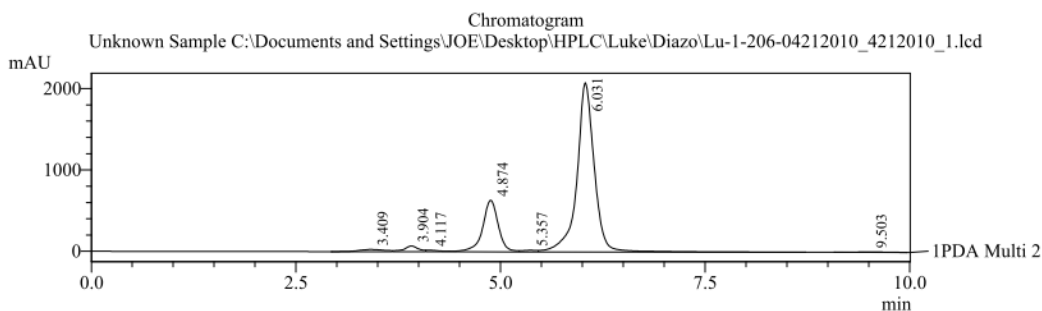

1 PDA Multi 2 / 217nm 4nm

Quantitative Results C:\Documents and Settings\JOE\Desktop\HPLC\Luke\Diazo\Lu-1-206-04212010\_4212010\_1.lcd

PDA

| ID# | Name  | Ret. Time | Area     | Conc.  |
|-----|-------|-----------|----------|--------|
| 1   | Cis   | 4.874     | 8447513  | 4.704  |
| 2   | Trans | 6.031     | 30785539 | 12.716 |

### 9.3 Second run

Same procedure as first run instead of 4.0 mg MOP-4 recovered from first run used.

Sample Information

Acquired by : Admin  
Sample Name : Unknown Sample  
Sample ID : UNK-0001  
Tray# : 1  
Vial# : 15  
Injection Volume : 5 uL  
Data Filename : Lu-1-206-04222010\_4222010\_1.lcd  
Method Filename : Shodex ORpak 60%MeOH 0.6mL.lcm  
Report Filename : Default.lcr  
Date Acquired : 4/23/2010 3:49:45 PM

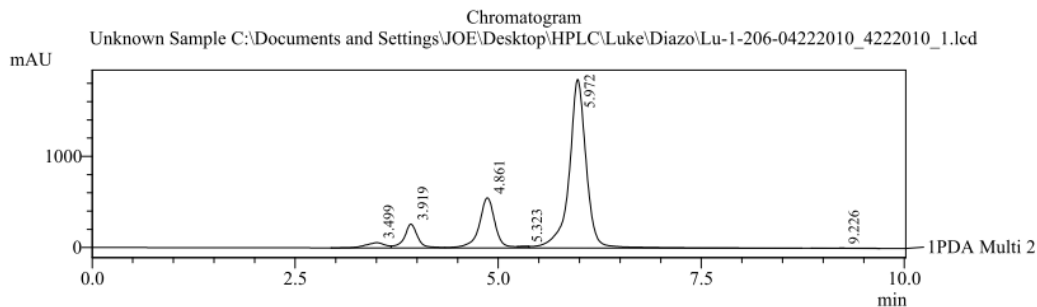

1 PDA Multi 2 / 217nm 4nm

Quantitative Results C:\Documents and Settings\JOE\Desktop\HPLC\Luke\Diazo\Lu-1-206-04222010\_4222010\_1.lcd

PDA

| ID# | Name  | Ret. Time | Area     | Conc.  |
|-----|-------|-----------|----------|--------|
| 1   | Cis   | 4.861     | 7550692  | 4.204  |
| 2   | Trans | 5.972     | 27224140 | 11.248 |

### 10. References

- [1] G. M. Sheldrick, *SHELXTL*, Version 6.14, Structure Determination Software Suite, Bruker AXS, Madison, WI, **2003**.
- [2] A. L. Spek, *PLATON*, A Multipurpose Crystallographic Tool, Utrecht University, Utrecht, The Netherlands, **1998**.
- [3] E. Reisner, S. J. Lippard, *Eur. J. Org. Chem.* **2008**, 2008, 156-163.
- [4] K. Fukushima, A. J. Vandenbos, T. Fujiwara, *Chem. Mater.* **2007**, 19, 644-646.
